# Supplementary material for: An azido–metal–isonicotinate complex showing long-range ordered ferromagnetic interaction: synthesis, structure and magnetic properties
Source: Royal Society of Chemistry journal article supplement (doi:10.1039/b601311b), 2006-01-01
Supplement: b601311b.pdf [file b601311b.pdf]

### Synthetic Procedures and Cautionary Measures:

All the experiments were carried out in an isolated room and the heating oven was put in an iron cabinet. All the experimenters should equip with resin veils when doing experiments..

Complex **1** was hydrothermally synthesized under autogenously pressure. A mixture of  $\text{Cu}(\text{NO}_3)_2 \cdot 3\text{H}_2\text{O}$  (0.081 g, 0.333 mmol),  $\text{NaN}_3$  (0.022 g, 0.333 mmol), Hnta (0.021g, 0.167 mmol) and  $\text{H}_2\text{O}$  (9.0 g, 500 mmol) at a ratio of 2:2:1:3000 was sealed in a volume of 18 ml Teflon-lined autoclave and heated from room temperature to  $140^\circ$  at  $10^\circ \cdot \text{h}^{-1}$ , kept for 2 days and cooled to room temperature at  $10^\circ \cdot \text{h}^{-1}$ . The green crystals were obtained in ca. 20% yield based on copper. Elemental analysis for the crystal product was satisfactory.

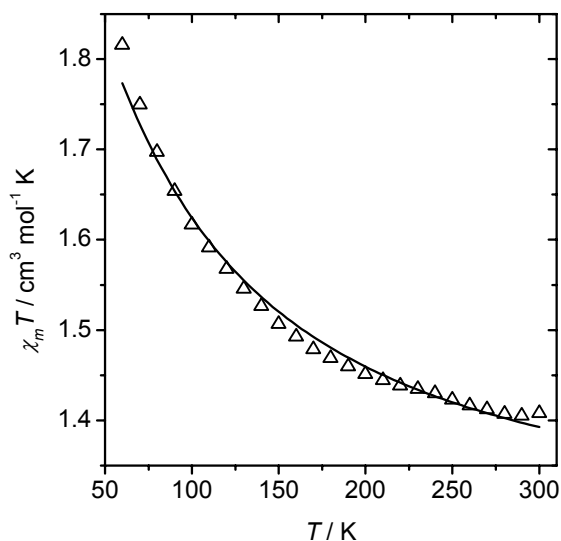

**Figure S1.** The high-temperature  $\chi_M T$  vs  $T$  curve for complex **1** at 10000 G. Solid line represents the best fit.
